# Supplementary material
Source: PubMed Central journal article supplement (PMC2958237)
Supplement: NIHMS241421-supplement-1_si_001.pdf [file NIHMS241421-supplement-1_si_001.pdf]

# Supporting Information

## Design and Synthesis of Phospholipase C and A<sub>2</sub>-Activatable Near Infrared Fluorescent Smart Probes

Anatoliy V. Popov,<sup>\*,†</sup> Theresa M. Mawn,<sup>†</sup> Soungkyoo Kim,<sup>†</sup> Gang Zheng,<sup>†,‡</sup> and  
E. James Delikatny<sup>†</sup>

<sup>†</sup>*University of Pennsylvania, Department of Radiology,  
Philadelphia PA, 19104, USA*

<sup>‡</sup>*University of Toronto, Department of Medical Biophysics,  
Toronto ON, M5G 1L7, Canada*

\*E-mail: [avpopov@mail.med.upenn.edu](mailto:avpopov@mail.med.upenn.edu)

### Table of Contents

|                                  |     |
|----------------------------------|-----|
| <b>List of abbreviations</b>     | S2  |
| <b>General Information</b>       | S4  |
| <b>Synthesis</b>                 | S6  |
| <b><sup>1</sup>H NMR Spectra</b> | S14 |
| <b>Enzyme mediated cleavage</b>  | S21 |
| <b>References</b>                | S21 |

## List of abbreviations

- BHQ-3 carboxylic acid – black hole quencher-3, 3-diethylamino-5-phenylphenazium-7-diazobenzene-4''-(*N*-methyl)-*N*-butyric acid
- BHQ-3<sup>+</sup>-SU PF<sub>6</sub><sup>-</sup> – succinimidyl ester of BHQ-3 carboxylic acid, hexafluorophosphate
- BOC – *tert*-butoxycarbonyl
- Cho – choline
- DCM – dichloromethane, CH<sub>2</sub>Cl<sub>2</sub>
- DMAP – 4-dimethylaminopyridine
- EDC – 1-ethyl-3-(3-dimethylaminopropyl) carbodiimide, hydrochloride salt
- Etn – ethanolamine
- H<sub>2</sub>N(CH<sub>2</sub>)<sub>11</sub>CO<sub>2</sub>H – λ-aminolauric acid
- H<sub>2</sub>N(CH<sub>2</sub>)<sub>5</sub>CO<sub>2</sub>H – ε-aminocaproic acid
- Invitrogen PED6 – *N*-((6-(2,4-dinitrophenyl)amino)hexanoyl)-2-(4,4-difluoro-5,7-dimethyl-4-bora-3a,4a-diaza-*s*-indacene-3-pentanoyl)-1-hexadecanoyl-*sn*-glycero-3-phosphoethanolamine, triethylammonium salt
- Invitrogen B77101 – 1,2-bis-(4,4-difluoro-5,7-dimethyl-4-bora-3a,4a-diaza-*s*-indacene-3-undecanoyl)-*sn*-glycero-3-phosphocholine
- MALDI-TOF – Matrix Assisted Laser Desorption/Ionization Time-of-Flight Mass Spectrometry
- N*-BOC *Lyso* PtdEtn – 1-palmytoyl-*sn*-glycero-3-phosphoethanolamine-*N*-(*tert*-butoxycarbonyl) (sodium salt)
- NHS – *N*-hydroxysuccinimide
- NIR – near infrared
- NIRF – near infrared fluorophore
- PC – phosphocholine
- PC-PLC – phosphatidylcholine-specific phospholipase C
- PC-PLD – phosphatidylcholine-specific phospholipase D
- PE – phosphoethanolamine
- PI-PLC – phosphatidylinositol-specific phospholipase C
- PL – phospholipase
- PLs – phospholipases
- PtdCho – phosphatidylcholine

PtdEtn – phosphatidylethanolamine  
PtdGro – phosphatidylglycerol  
PtdIns – phosphatidylinositol  
PtdSer – phosphatidylserine  
Pyro – pyropheophorbide *a*  
Pyro-SU – succinimidyl ester of pyropheophorbide *a*  
PyroC<sub>12</sub> acid –  $\lambda$ -Pyropheophorbideamidolauric acid or 17<sup>3</sup>-deoxy-17<sup>3</sup>-  
( $\alpha$ -carbhydroxyundecylene- $\lambda$ - amino)pyropheophorbide *a*  
PyroC<sub>12</sub>-PtdEtn – 1-palmitoyl-2-( $\lambda$ -pyropheophorbideamidolauroyl)-*sn*-glycero-3-  
phosphoethanolamine  
PyroC<sub>12</sub>-PtdEtn-BHQ – 1-palmitoyl-2-( $\lambda$ -pyropheophorbideamidolauroyl)-*sn*-glycero-3-  
phosphoethanolamide of BHQ-3 carboxylic acid  
PyroC<sub>6</sub> acid –  $\epsilon$ -Pyropheophorbideamidocaproic acid or 17<sup>3</sup>-deoxy-17<sup>3</sup>-( $\alpha$ -  
carbhydroxypentylene- $\epsilon$ -amino)pyropheophorbide *a*  
PyroC<sub>6</sub>-PyroC<sub>6</sub>-PtdCho – 1,2-bis( $\epsilon$ -pyropheophorbideamidocaproyl)-*sn*-glycero-3-  
phosphocholine  
Pyro-PtdEtn – 1-palmitoyl-2-pyropheophorbide-*sn*-glycero-3-phosphoethanolamine  
Pyro-PtdEtn-BHQ – 1-palmitoyl-2-pyropheophorbide-*sn*-glycero-3-phosphoethanolamide of  
BHQ-3 carboxylic acid  
SMase – sphingomyelinase  
sPLA<sub>2</sub> – secretory phospholipase A<sub>2</sub>  
TEA, Et<sub>3</sub>N – triethylamine  
TFA – trifluoroacetic acid  
TLC – thin layer chromatography

## I. General Information

Dry solvents were purchased from ACROS Organics. Regular solvents and Celite were purchased from Fisher Scientific. *Spirulina Pacifica* algae (the starting material for Pyropheophorbide *a*) was purchased from Cyanotech Corporation, Kailua-Kona, HI, USA. *N*-BOC Lyso PtdEtn (N-Boc16:0 Lyso PE) was purchased from Avanti Polar Lipids, Inc., Alabaster, AL, USA. BHQ-3 carboxylic acid succinimidyl ester hexafluorophosphate was purchased from Bioresearch Technologies, Novato, CA, USA. Other reagents/reactants were purchased from Sigma-Aldrich and used without further purification. Silica Gel Standard Grade (230x450 mesh) was purchased from Sorbent Technologies, Atlanta, GA, USA. Thin Layer Chromatography Plates, Partsil® PK6F, Silica Gel 60 Å, 20x20 cm, were purchased from Whatman, washed with EtAc-MeOH (60:40, v/v) and baked at 150 °C overnight before use. All chemical reactions with pyropheophorbide *a* and its derivatives were carried out in the dark under dry Ar. <sup>1</sup>H NMR spectra were recorded using a Bruker DMX 360 MHz spectrometer. MALDI-TOF mass-spectra were recorded with an Applied Biosystems Voyager DE Mass Spectrometer using a positive mode ionization and CHCA ( $\alpha$ -Cyano-4-hydroxycinnamic Acid) or HABA (2-(4-hydroxyphenylazo)benzoic acid) matrix. Time-dependent release of fluorescence was measured using a SpectraMax M5 fluorescent plate reader.

**Table 1.** Phospholipases

| PL                               | Company         | Catalog № | CAS №      | Source                           | E.C. №   | Enzyme Specificity                                                                                                                                                                                         |
|----------------------------------|-----------------|-----------|------------|----------------------------------|----------|------------------------------------------------------------------------------------------------------------------------------------------------------------------------------------------------------------|
| PLD                              | Sigma           | P0065     | 9001-87-0  | <i>Streptomyces chromofuscus</i> | 3.1.4.4  | Hydrolyzes the phosphate bonds of phospholipids, lysophospholipids and sphingomyelin to give the corresponding phosphatidic acid <sup>a</sup> . Prefers PtdCho and PtdEtn to PtdSer, PtdIns or PtdGro (1). |
| SMase                            | Sigma           | S7651     | 9031-54-3  | <i>Bacillus cereus</i>           | 3.1.4.12 | Highly specific. Generates ceramide from sphingomyelin. Activity enhanced by the presence of PtdEtn or cholesterol and inhibited by PtdCho (2).                                                            |
| PI-PLC                           | Sigma           | P5542     | 37288-19-0 | <i>Bacillus cereus</i>           | 4.6.1.13 | Highly specific. Cleaves PtdIns and phosphorylated derivatives (3). Does not cleave PtdCho, PtdEtn or Sphingomyelin (4, 5).                                                                                |
| sPLA <sub>2</sub> IB porcine     | Sigma           | P6534     | 9001-84-7  | Porcine pancreas                 | 3.1.1.4  | Acts preferentially on anionic (PtdGro, PtdEtn and PtdSer) compared to charge-neutral PtdCho phospholipid vesicles (6-9).                                                                                  |
| sPLA <sub>2</sub> IB bovine      | Sigma           | P8913     | 9001-84-7  | Bovine pancreas                  | 3.1.1.4  | See above                                                                                                                                                                                                  |
| sPLA <sub>2</sub> III            | Cayman Chemical | 60500     | 9001-84-7  | Bee venom                        | 3.1.1.4  | Preferred substrates are PtdCho, PtdEtn and their plasmalogen analogues. PtdIns and PtdSer are also hydrolyzed ( <sup>a</sup> and (10)).                                                                   |
| sPLA <sub>2</sub> V <sup>b</sup> | Cayman Chemical | 10009563  | 9001-84-7  | Human recombinant                | 3.1.1.4  | Hydrolyzes both anionic phospholipids and PtdCho (11-13).                                                                                                                                                  |

<sup>a</sup> manufacturer's product information

<sup>b</sup> Accession № NP\_000920 (provided by Cayman Chemical)

Phospholipases were dissolved in Tris buffer (50 mM Tris-HCl, pH 7.4) and stored in aliquots at -20 °C.

## II. Synthesis

Pyropheophorbide *a* (**1**) was prepared from *Spirulina Pacifica* algae according to procedure (14).

### General procedure for synthesis of *N*-Pyropheophorbide substituted $\omega$ -amino acids (PyroC<sub>6</sub> and PyroC<sub>12</sub> acids)

A 500 mL round bottom flask was charged with pyropheophorbide acid (**1**) (0.38 mmol), NHS (0.38 mmol), EDC (0.38 mmol), DMAP (23.3 mg, 0.19 mmol) and 200 ml of dry DCM. The reaction mixture was stirred in dark under Ar for 3 h until Pyropheophorbide acid was converted completely into its succinimidyl ester (TLC CHCl<sub>3</sub>/MeOH = 5/1, v/v). Then H<sub>2</sub>N(CH<sub>2</sub>)<sub>n</sub>CO<sub>2</sub>H (n = 5, 11, 0.38 mmol) and dry pyridine (25 ml) were added. The second reaction was carried out for 48 h until complete conversion of Pyro-SU. The solvents were then evaporated; the solid residue was dissolved in 100 ml of DCM, rinsed twice with 2% HCl, then water. The product was isolated by column chromatography on silica gel using (DCM-ethyl acetate (0-100%), then ethyl acetate-MeOH (0-40%)). Isolated yields are 75-85%.

### $\epsilon$ -Pyropheophorbideamidocaproic acid or 17<sup>3</sup>-deoxy-17<sup>3</sup>-( $\alpha$ -carboxypentylene- $\epsilon$ -amino)pyropheophorbide *a*, PyroC<sub>6</sub> acid (**8**)

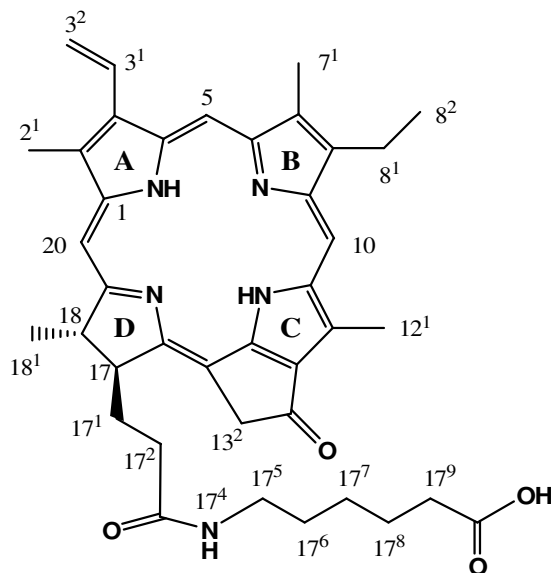

Yield 185 mg, 75%.  $^1\text{H}$  NMR (360 MHz,  $\text{CDCl}_3$ ,  $\text{CD}_3\text{OD}$   $\delta$  ppm): 9.14, 9.02 and 8.38 (each s, 1H, 5-*H*, 10-*H* and 20-*H*); 7.74 (dd,  $J=11.5$  Hz,  $J=17.6$  Hz, 1H, 3<sup>1</sup>-*CH=CH*<sub>2</sub>); 6.09 (d,  $J=17.6$  Hz, 1H, *trans*-3<sup>2</sup>-*CH=CHH*); 5.99 (d,  $J=11.5$  Hz, 1H, *cis*-3<sup>2</sup>-*CH=CHH*); 5.03 (AB,  $A=5.11$ ,  $B=4.96$ ,  $J_{\text{AB}}=20.2$  Hz, 2H, 13<sup>2</sup>-*CH*<sub>2</sub>); 4.32 (q,  $J=8.1$  Hz, 1H, 18-*H*); 4.12 (dm, 8.7 Hz, 1H, 17-*H*); 3.45-3.32 m 5H, 3.27-3.12 m 5H and 2.94 s 3H (2<sup>1</sup>-*CH*<sub>3</sub>, 12<sup>1</sup>-*CH*<sub>3</sub>, 7<sup>1</sup>-*CH*<sub>3</sub>, 8<sup>1</sup>-*CH*<sub>2</sub>, 17<sup>5</sup>-*CH*<sub>2</sub>); 2.61-2.39 m 2H and 2.31-2.08 m 4H (17<sup>2</sup>-*CH*<sub>2</sub>, 17<sup>9</sup>-*CH*<sub>2</sub>, 17<sup>1</sup>-*CH*<sub>2</sub>); 1.77-1.40 m 10H (18<sup>1</sup>-*CH*<sub>3</sub>, 8<sup>2</sup>-*CH*<sub>3</sub>, 17<sup>6</sup>-*CH*<sub>2</sub>, 17<sup>8</sup>-*CH*<sub>2</sub>); 1-36-1.21 (m, 2H, 17<sup>7</sup>-*CH*<sub>2</sub>). MALDI-TOF,  $m/z$ :  $(\text{M}+\text{Na})^+$  670.41, calculated for  $\text{C}_{39}\text{H}_{45}\text{N}_5\text{NaO}_4$  670.34.

**$\lambda$ -Pyropheophorbideamidolauric acid or 17<sup>3</sup>-deoxy-17<sup>3</sup>-( $\alpha$ -carbhydroxyundecylene- $\lambda$ -amino)pyropheophorbide *a*, PyroC<sub>12</sub> acid (5)**

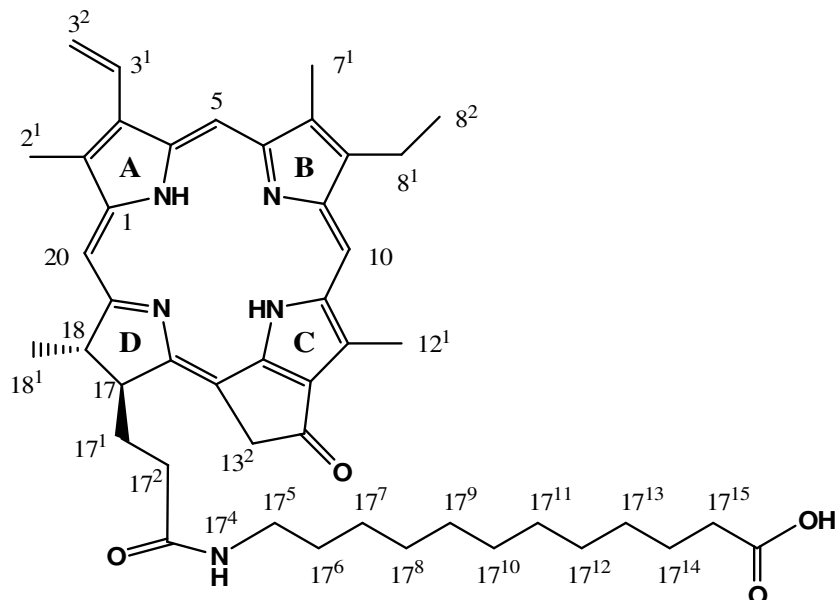

Yield 236 mg, 85%.  $^1\text{H}$  NMR (360 MHz,  $\text{CDCl}_3$ ,  $\text{CD}_3\text{OD}$   $\delta$  ppm): 9.17, 9.06 and 8.41 (each s, 1H, 5-*H*, 10-*H* and 20-*H*); 7.77 (dd,  $J=11.5$  Hz,  $J=17.6$  Hz, 1H, 3<sup>1</sup>-*CH=CH*<sub>2</sub>); 6.11 (d,  $J=17.6$  Hz, 1H, *trans*-3<sup>2</sup>-*CH=CHH*); 6.02 (d,  $J=11.5$  Hz, 1H, *cis*-3<sup>2</sup>-*CH=CHH*); 5.06 (AB,  $A=5.14$ ,  $B=4.99$ ,  $J_{\text{AB}}=20.2$  Hz, 2H, 13<sup>2</sup>-*CH*<sub>2</sub>); 4.36 (q,  $J=8.1$  Hz, 1H, 18-*H*); 4.15 (dm, 8.7 Hz, 1H, 17-*H*); 3.51-3.35 m 5H, 3.30-3.14 m 5H and 2.98 s 3H (2<sup>1</sup>-*CH*<sub>3</sub>, 12<sup>1</sup>-*CH*<sub>3</sub>, 7<sup>1</sup>-*CH*<sub>3</sub>, 8<sup>1</sup>-*CH*<sub>2</sub>, 17<sup>5</sup>-*CH*<sub>2</sub>); 2.67-2.41 m 2H and 2.35-2.08 m 4H (17<sup>2</sup>-*CH*<sub>2</sub>, 17<sup>15</sup>-*CH*<sub>2</sub>, 17<sup>1</sup>-*CH*<sub>2</sub>); 1.79-1.46 m 10H (18<sup>1</sup>-*CH*<sub>3</sub>, 8<sup>2</sup>-*CH*<sub>3</sub>, 17<sup>6</sup>-*CH*<sub>2</sub>, 17<sup>14</sup>-*CH*<sub>2</sub>); 1.44-1.12 (m, 14H, 17<sup>7</sup>-17<sup>13</sup> 7x*CH*<sub>2</sub>). MALDI-TOF,  $m/z$ :  $(\text{M}+\text{Na})^+$  754.51, calculated for  $\text{C}_{45}\text{H}_{57}\text{N}_5\text{NaO}_4$  754.43.

### General procedure for synthesis of 2-pyropheophorbide *a* (with and without C<sub>12</sub> spacer) substituted 1-palmitoyl-*sn*-glycero-3-phosphoethanolamines

A 200 mL dry flask was charged with *N*-BOC *Lyso* PtdEtn (0.087 mmol), a Pyro-containing acid (0.087 mmol), EDC (0.130 mmol), DMAP (0.043 mmol) and DCM (70 mL). The conversion of Pyro-acid was monitored by TLC (CHCl<sub>3</sub>/MeOH = 4/2). After 72 h the reaction mixture was diluted with hexanes (30 mL) and passed through a small column with Celite to eliminate non-soluble by-products. After evaporation of solvents, the solid was dissolved in a small amount of DCM and moved into a dry 100 mL flask. After solvent evaporation the residue was dried under high vacuum overnight. Then dry DCM (25 mL) was added, the flask was cooled until -20 °C and TFA (5 mL) was added. The BOC-deprotection reaction was carried out at 0 °C 4 h. Following that, dry toluene (20 mL) was added (to avoid TFA concentrating under evaporation) and volatiles were removed under vacuum. The solid residue was treated with 5% solution of Et<sub>3</sub>N in DCM (30 mL) to neutralize traces of TFA. After liquids evaporation the residue was dried under high vacuum overnight. This residue was then dissolved in dry DCM and put onto 6 preparative TLC plates. Preparative TLC (20% MeOH in CHCl<sub>3</sub>) resulted in the Pyro-PtdEtn derivative as a dark green amorphous solid.

### 1-palmitoyl-2-pyropheophorbide-*sn*-glycero-3-phosphoethanolamine, Pyro-PtdEtn (3)

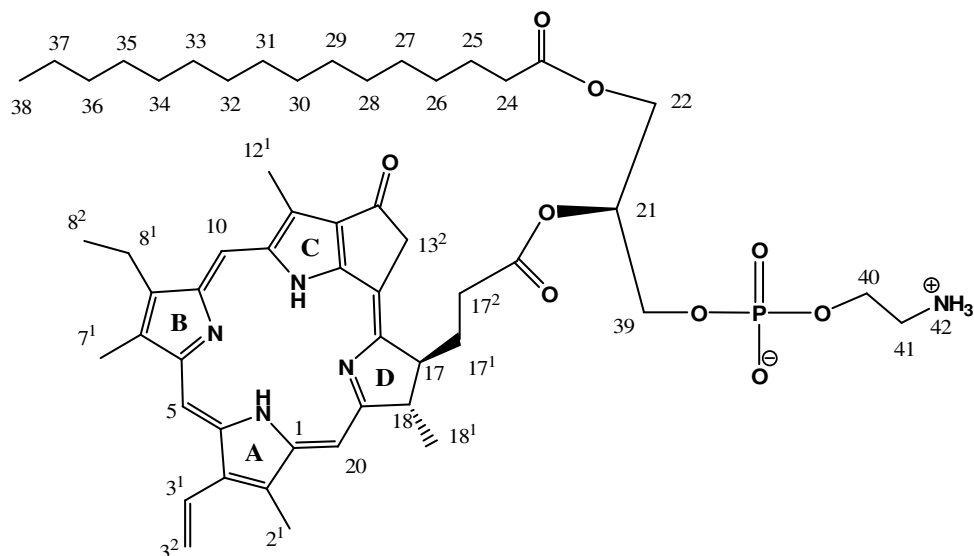

Yield 17 mg, 20%.  $R_f = 0.40$  (CHCl<sub>3</sub>/CH<sub>3</sub>OH = 4/1, v/v). <sup>1</sup>H NMR (360 MHz, CDCl<sub>3</sub>/CD<sub>3</sub>OD,  $\delta$  ppm): 9.37, 9.28 and 8.50 (each s, 1H, 5-*H*, 10-*H* and 20-*H*); 7.93 (dd,  $J=11.5$  Hz,  $J=17.6$  Hz, 1H, 3<sup>1</sup>-CH=CH<sub>2</sub>); 6.24 (d,  $J=17.6$  Hz, 1H, *trans*-3<sup>2</sup>-CH=CHH); 6.13 (d,  $J=11.5$  Hz, 1H, *cis*-3<sup>2</sup>-



CH=CHH); 5.40-5.01 m 3H (21-H, 13<sup>2</sup>-CH<sub>2</sub>); 4.45 m 2H and 4.32-3.94 m 6H (18-H, 17-H, 22-CH<sub>2</sub>, 39-CH<sub>2</sub>, 40-CH<sub>2</sub>); 3.71-3.51 m 5H, 3.47-3.29 m 5H and 3.18 s 3H (2<sup>1</sup>-CH<sub>3</sub>, 12<sup>1</sup>-CH<sub>3</sub>, 7<sup>1</sup>-CH<sub>3</sub>, 8<sup>1</sup>-CH<sub>2</sub>, 41-CH<sub>2</sub>); 3.12-2.53 m 2H and 2.41-2.14 m 4H (17<sup>2</sup>-CH<sub>2</sub>, 24-CH<sub>2</sub>, 17<sup>1</sup>-CH<sub>2</sub>); 1.85-1.56 m 8H and 1.45-1.14 m 24H (18<sup>1</sup>-CH<sub>3</sub>, 8<sup>2</sup>-CH<sub>3</sub>, 25-37 13xCH<sub>2</sub>); 1.05-0.87 (m, 3H, 38-CH<sub>3</sub>). MALDI-TOF, *m/z*: (M+Na)<sup>+</sup> 992.69, calculated for C<sub>54</sub>H<sub>76</sub>N<sub>5</sub>NaO<sub>9</sub>P 992.53.

**1-palmitoyl-2-(λ-pyropheophorbideamidolauroyl)-*sn*-glycero-3-phosphoethanolamine, PyroC<sub>12</sub>-PtdEtn (6)**

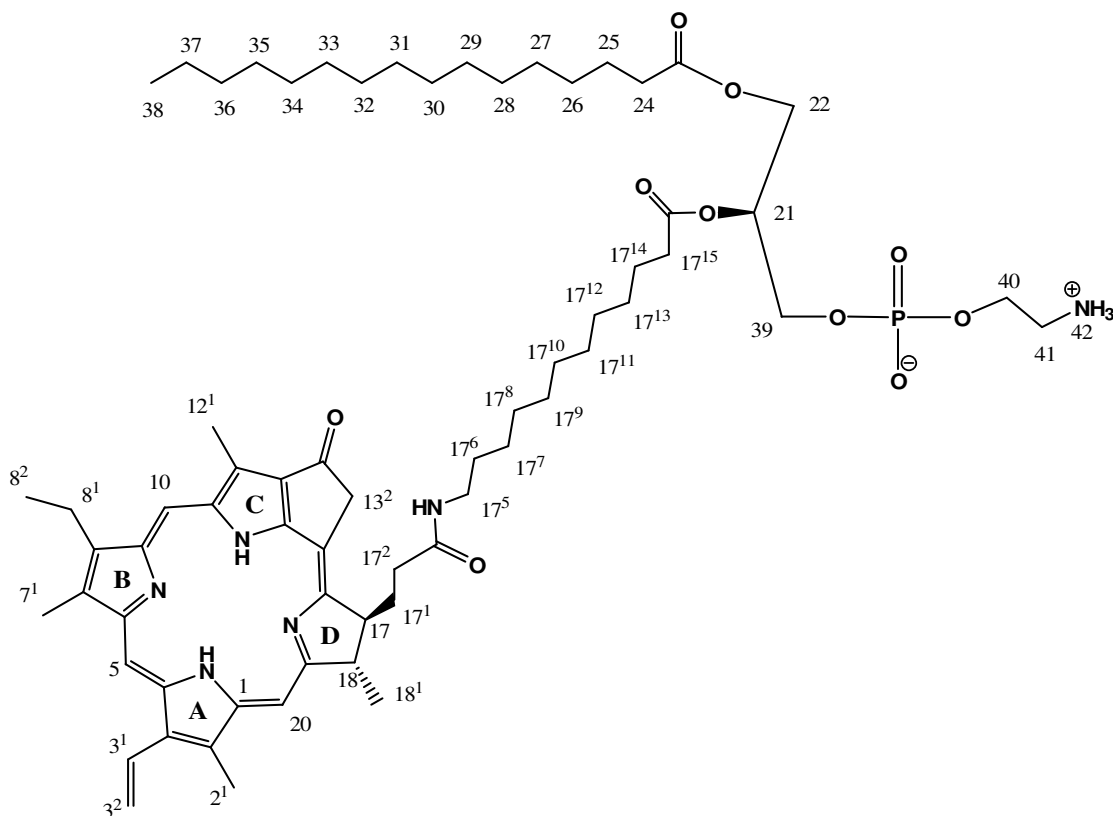

Yield 18 mg, 18%. *R<sub>f</sub>* = 0.25 (CHCl<sub>3</sub>/CH<sub>3</sub>OH = 4/1, v/v). <sup>1</sup>H NMR (360 MHz, CDCl<sub>3</sub>/CD<sub>3</sub>OD, CD<sub>2</sub>Cl<sub>2</sub>, δ ppm): 9.18, 9.07 and 8.42 (each s, 1H, 5-H, 10-H and 20-H); 7.79 (dd, J=11.5 Hz, J=17.6 Hz, 1H, 3<sup>1</sup>-CH=CH<sub>2</sub>); 6.13 (d, J=17.6 Hz, 1H, *trans*-3<sup>2</sup>-CH=CHH); 6.04 (d, J=11.5 Hz, 1H, *cis*-3<sup>2</sup>-CH=CHH); 5.18-4.93 m 3H (21-H, 13<sup>2</sup>-CH<sub>2</sub>, overlapped partially with CD<sub>2</sub>Cl<sub>2</sub>); 4.60-3.96 m 8H (18-H, 17-H, 22-CH<sub>2</sub>, 39-CH<sub>2</sub>, 40-CH<sub>2</sub>); 3.55-2.91 m, m and s 15H, (2<sup>1</sup>-CH<sub>3</sub>, 12<sup>1</sup>-CH<sub>3</sub>, 7<sup>1</sup>-CH<sub>3</sub>, 8<sup>1</sup>-CH<sub>2</sub>, 17<sup>5</sup>-CH<sub>2</sub>, 41-CH<sub>2</sub>); 2.64-2.11 m 8H (17<sup>2</sup>-CH<sub>2</sub>, 24-CH<sub>2</sub>, 17<sup>1</sup>-CH<sub>2</sub>, 17<sup>15</sup>-

$\text{CH}_2$ ); 1.85-1.14 m 50H ( $18^1\text{-CH}_3$ ,  $8^2\text{-CH}_3$ , 25-37 and  $17^6\text{-}17^{14}$   $22\times\text{CH}_2$ ); 1.06-0.90 (m, 3H,  $38\text{-CH}_3$ ). MALDI-TOF,  $m/z$ :  $(\text{M}+\text{Na})^+$  1189.86, calculated for  $\text{C}_{66}\text{H}_{99}\text{N}_6\text{NaO}_{10}\text{P}$  1189.71.

### General procedure for synthesis of Pyro-PtdEtn-BHQ and PyroC<sub>12</sub>-PtdEtn-BHQ

A 100 mL flask was loaded with a Pyro-containing PtdEtn (**3** or **6**) (0.013 mmol), BHQ-3<sup>+</sup>-SU PF<sub>6</sub><sup>-</sup> (0.013 mmol) and 50 mL of dry DCM. After dissolution 1 drop of Et<sub>3</sub>N was added. The reaction was carried out for 4 h. Volatiles were removed in a rotary evaporator and the residue was dried under high vacuum overnight. The residue was dissolved in CHCl<sub>3</sub> and put onto 4 preparative TLC plates. Thin layer preparative chromatography gave in result the final product as a dark sea-green amorphous solid.

### 1-palmitoyl-2-pyropheophorbide-*sn*-glycero-3-phosphoethanolamide of BHQ-3 carboxylic acid, Pyro-PtdEtn-BHQ (**4**)

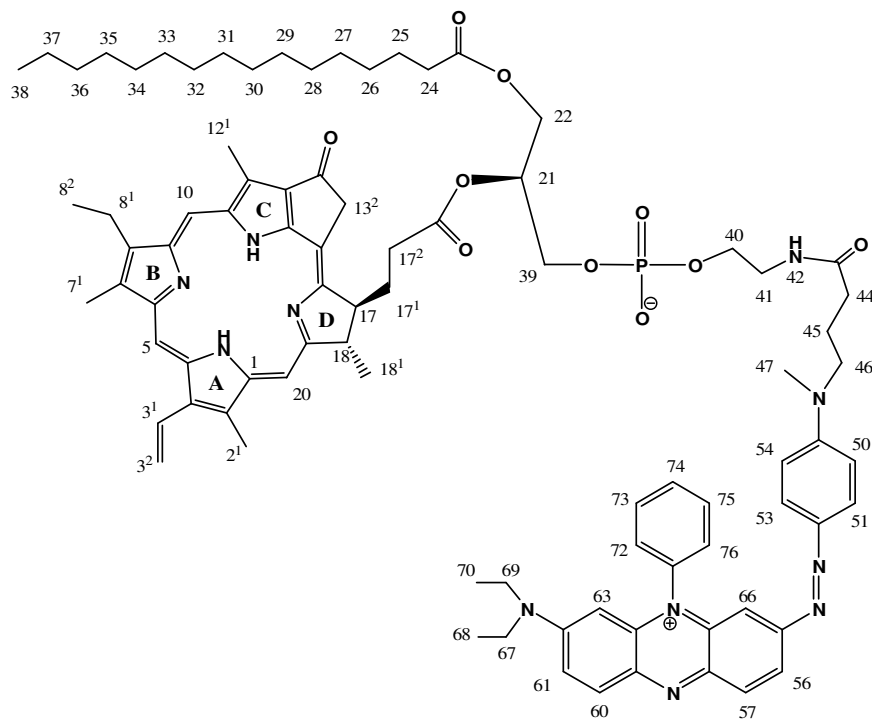

3.70-3.08 m 19H and 2.90 s 3H ( $2^1$ -CH<sub>3</sub>,  $12^1$ -CH<sub>3</sub>,  $7^1$ -CH<sub>3</sub>, 47-CH<sub>3</sub>  $8^1$ -CH<sub>2</sub>, 41-CH<sub>2</sub>, 46-CH<sub>2</sub>, 67-CH<sub>2</sub>, 69-CH<sub>2</sub>); 2.74-2.14 (m, 8H,  $17^2$ -CH<sub>2</sub>, 24-CH<sub>2</sub>,  $17^1$ -CH<sub>2</sub>, 44-CH<sub>2</sub>); 1.96-1.10 (m, 40H,  $18^1$ -CH<sub>3</sub>,  $8^2$ -CH<sub>3</sub>, 68-CH<sub>3</sub>, 70-CH<sub>3</sub>, 25-37 and 46- 14xCH<sub>2</sub>); 1.04-0.86 (m, 3H, 38-CH<sub>3</sub>). MALDI-TOF,  $m/z$ : (M+Na)<sup>+</sup> 1520.93, calculated for C<sub>87</sub>H<sub>108</sub>N<sub>11</sub>NaO<sub>10</sub>P 1520.79.

**1-palmitoyl-2-(λ-pyrropeophorbideamidolauroyl)-sn-glycero-3-phosphoethanolamide of BHQ-3 carboxylic acid, PyroC<sub>12</sub>-PtdEtn-BHQ (7)**

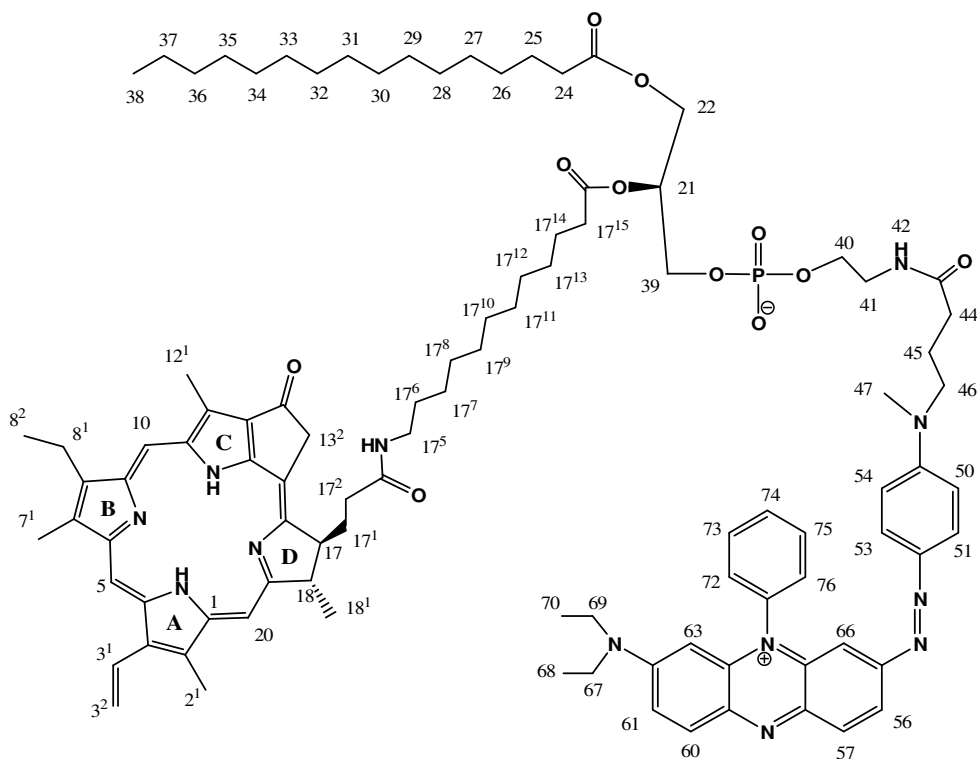

Yield 12.5 mg, 57%.  $R_f$  = 0.3 (CHCl<sub>3</sub>/CH<sub>3</sub>OH = 5/1, v/v). <sup>1</sup>H NMR (360 MHz, CDCl<sub>3</sub>, CD<sub>3</sub>OD, CD<sub>2</sub>Cl<sub>2</sub>, δ ppm): 9.19, 9.09 and 8.44 (each s, 1H, 5-H, 10-H and 20-H); 8.06-6.52 m 16H (50-H, 51-H, 53-H, 54-H, 56-H, 57-H, 60-H, 61-H, 63-H, 72-76 5xH,  $3^1$ -CH=CH<sub>2</sub>, overlapped partially with CDCl<sub>3</sub>); 6.14 (d, J=17.6 Hz, 1H, *trans*- $3^2$ -CH=CHH); 6.05 (d, J=11.5 Hz, 1H, *cis*- $3^2$ -CH=CHH); 5.24-4.93 m 3H (21-H,  $13^2$ -CH<sub>2</sub>, overlapped partially with CD<sub>2</sub>Cl<sub>2</sub>); 4.65-3.94 (m, 8H, 18-H, 17-H, 22-CH<sub>2</sub>, 39-CH<sub>2</sub>, 40-CH<sub>2</sub>); 3.59-3.13 m 18H, 2.98 s 3H and 2.90 s 3H ( $2^1$ -CH<sub>3</sub>,  $12^1$ -CH<sub>3</sub>,  $7^1$ -CH<sub>3</sub>, 47-CH<sub>3</sub>,  $8^1$ -CH<sub>2</sub>,  $17^5$ -CH<sub>2</sub>, 41-CH<sub>2</sub>, 46-CH<sub>2</sub>, 67-CH<sub>2</sub>, 69-CH<sub>2</sub>); 2.64-2.10 (m, 10H,  $17^2$ -CH<sub>2</sub>, 24-CH<sub>2</sub>,  $17^1$ -CH<sub>2</sub>,  $17^{15}$ -CH<sub>2</sub>, 44-CH<sub>2</sub>); 1.93-1.08 (m, 58H,  $18^1$ -CH<sub>3</sub>,  $8^2$ -CH<sub>3</sub>, 68-

$CH_3$ , 70- $CH_3$ , 25-37, 46- and 17<sup>6</sup>-17<sup>14</sup> 23x $CH_2$ ); 1.05-0.95 (m, 3H, 38- $CH_3$ ). MALDI-TOF,  $m/z$ : (M+Na)<sup>+</sup> 1718.14, calculated for C<sub>99</sub>H<sub>131</sub>N<sub>12</sub>NaO<sub>11</sub>P 1717.97.

**Synthesis of 1,2-bis( $\epsilon$ -pyropheophorbideamidocaproyl)-*sn*-glycero-3-phosphocholine, PyroC<sub>6</sub>-PyroC<sub>6</sub>-PtdCho (10)**

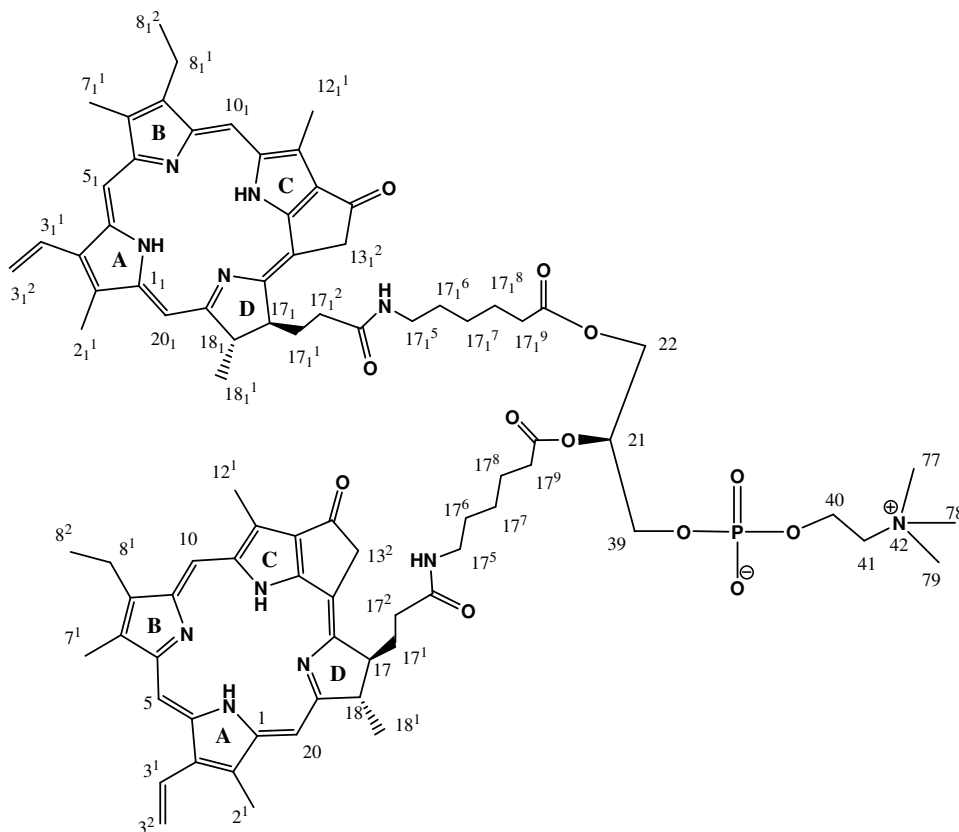

A 100 mL flask was loaded with *sn*-glycero-3-phosphocholine (**9**) (0.026 mmol),  $\epsilon$ -Pyropheophorbideamidocaproic acid (**8**) (0.077 mmol), and 50 mL dry MeOH. The mixture was stirred 1h at rt. Then methanol was evaporated under low pressure and the resulting film was dried under high vacuum overnight. Next, EDC (0.077 mmol), DMAP (0.077 mmol) and dry DCM (50 mL) were added to the flask. The reaction mixture was stirred in dark under Ar at 40 °C for 85 h. After that the solution was rinsed with 0.5N HCl, and dried over Na<sub>2</sub>SO<sub>4</sub>. After solvent evaporation the mixture was dissolved in DCM and put onto three preparative TLC plates. Preparative TLC with CHCl<sub>3</sub>/MeOH (3/1, v/v) resulted in a mixture of mono- and disubstituted *sn*-glycero-3-phosphocholines ( $R_f=0.1-0.2$ ). The latter was separated a second time on TLC plates with CHCl<sub>3</sub>/MeOH/H<sub>2</sub>O (2/1/1, v/v/v). The target product ( $R_f=0.35$ ,

CHCl<sub>3</sub>/MeOH/H<sub>2</sub>O = 2/1/1, v/v/v) was isolated with the yield of 11% (4.3 mg) as an amorphous dark green solid. <sup>1</sup>H NMR (360 MHz, CDCl<sub>3</sub>, CD<sub>3</sub>OD, CD<sub>2</sub>Cl<sub>2</sub>, δ ppm): 9.36, 9.27, 9.16, 9.04, 8.49, and 8.40 (each s, 1H, 5-*H*, 10-*H*, 20-*H*, 5<sub>1</sub>-*H*, 10<sub>1</sub>-*H* and 20<sub>1</sub>-*H*); 7.99-7.70 (m, 2H, 3<sup>1</sup>-*H* and 3<sub>1</sub><sup>1</sup>-*H*), 6.30-5.98 (m, 4H, 3<sup>2</sup>-CH<sub>2</sub> and 3<sub>1</sub><sup>2</sup>-CH<sub>2</sub>), 5.33-4.93 (m, 5H, 21-*H*, 13<sup>2</sup>-CH<sub>2</sub> and 13<sub>1</sub><sup>2</sup>-CH<sub>2</sub>, overlapped partially with CD<sub>2</sub>Cl<sub>2</sub>); 4.52-3.90 (m, 10H, 18-*H*, 17-*H*, 18<sub>1</sub>-*H*, 17<sub>1</sub>-*H*, 22-CH<sub>2</sub>, 39-CH<sub>2</sub>, 40-CH<sub>2</sub>); 3.67-2.93 (m, 37H, 2<sup>1</sup>-CH<sub>3</sub>, 2<sub>1</sub><sup>1</sup>-CH<sub>3</sub>, 12<sup>1</sup>-CH<sub>3</sub>, 12<sub>1</sub><sup>1</sup>-CH<sub>3</sub>, 7<sup>1</sup>-CH<sub>3</sub>, 7<sub>1</sub><sup>1</sup>-CH<sub>3</sub>, 77-CH<sub>3</sub>, 78-CH<sub>3</sub>, 79-CH<sub>3</sub>, 8<sup>1</sup>-CH<sub>2</sub>, 8<sub>1</sub><sup>1</sup>-CH<sub>2</sub>, 17<sup>5</sup>-CH<sub>2</sub>, 17<sub>1</sub><sup>5</sup>-CH<sub>2</sub>, 41-CH<sub>2</sub>, overlapped partially with CD<sub>3</sub>OD); 2.71-2.10 (m, 12H, 17<sup>2</sup>-CH<sub>2</sub>, 17<sup>9</sup>-CH<sub>2</sub>, 17<sup>1</sup>-CH<sub>2</sub>, 17<sub>1</sub><sup>2</sup>-CH<sub>2</sub>, 17<sub>1</sub><sup>9</sup>-CH<sub>2</sub>, 17<sub>1</sub><sup>1</sup>-CH<sub>2</sub>); 1.83-1.46 (m, 20H, 18<sup>1</sup>-CH<sub>3</sub>, 8<sup>2</sup>-CH<sub>3</sub>, 17<sup>6</sup>-CH<sub>2</sub>, 17<sup>8</sup>-CH<sub>2</sub>, 18<sub>1</sub><sup>1</sup>-CH<sub>3</sub>, 8<sub>1</sub><sup>2</sup>-CH<sub>3</sub>, 17<sub>1</sub><sup>6</sup>-CH<sub>2</sub>, 17<sub>1</sub><sup>8</sup>-CH<sub>2</sub>); 1.36-1.20 (m, 4H, 17<sup>7</sup>-CH<sub>2</sub>, 17<sub>1</sub><sup>7</sup>-CH<sub>2</sub>). MALDI-TOF, *m/z*: (M+Na)<sup>+</sup> 1538.92, calculated for C<sub>86</sub>H<sub>106</sub>N<sub>11</sub>NaO<sub>12</sub>P 1538.77.

### III. $^1\text{H}$ NMR Spectra

PyroC6 acid (**8**),  $^1\text{H}$  NMR, 360 MHz,  $\text{CDCl}_3$ ,  $\text{CD}_3\text{OD}$

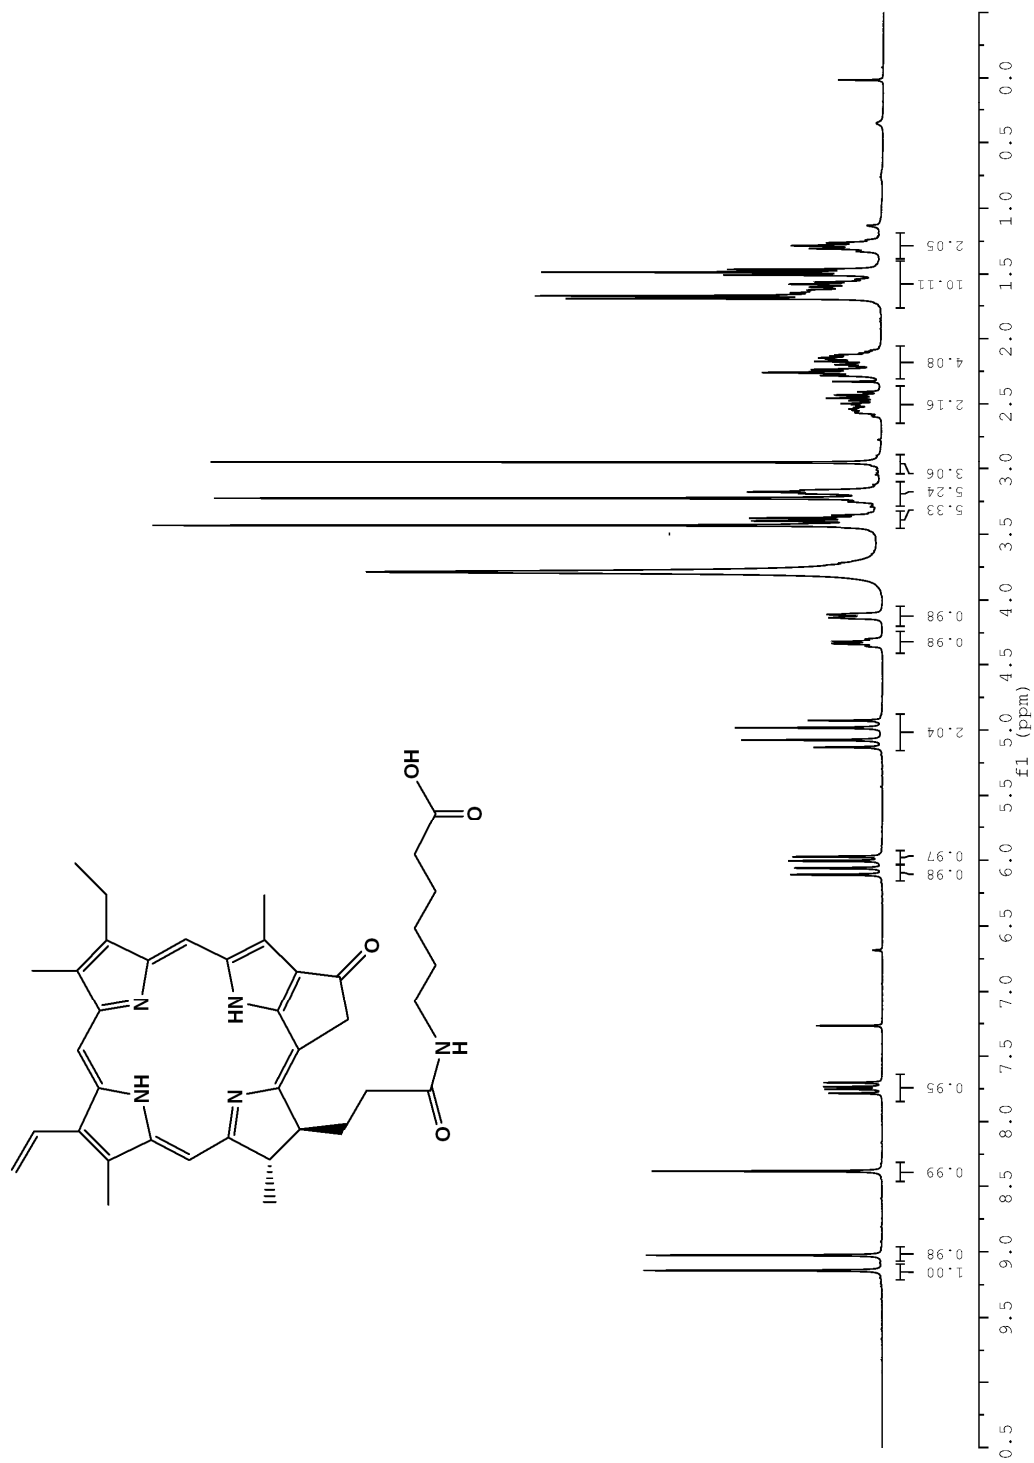

PyroC12 acid (5), <sup>1</sup>H NMR, 360 MHz, CDCl<sub>3</sub>, CD<sub>3</sub>OD

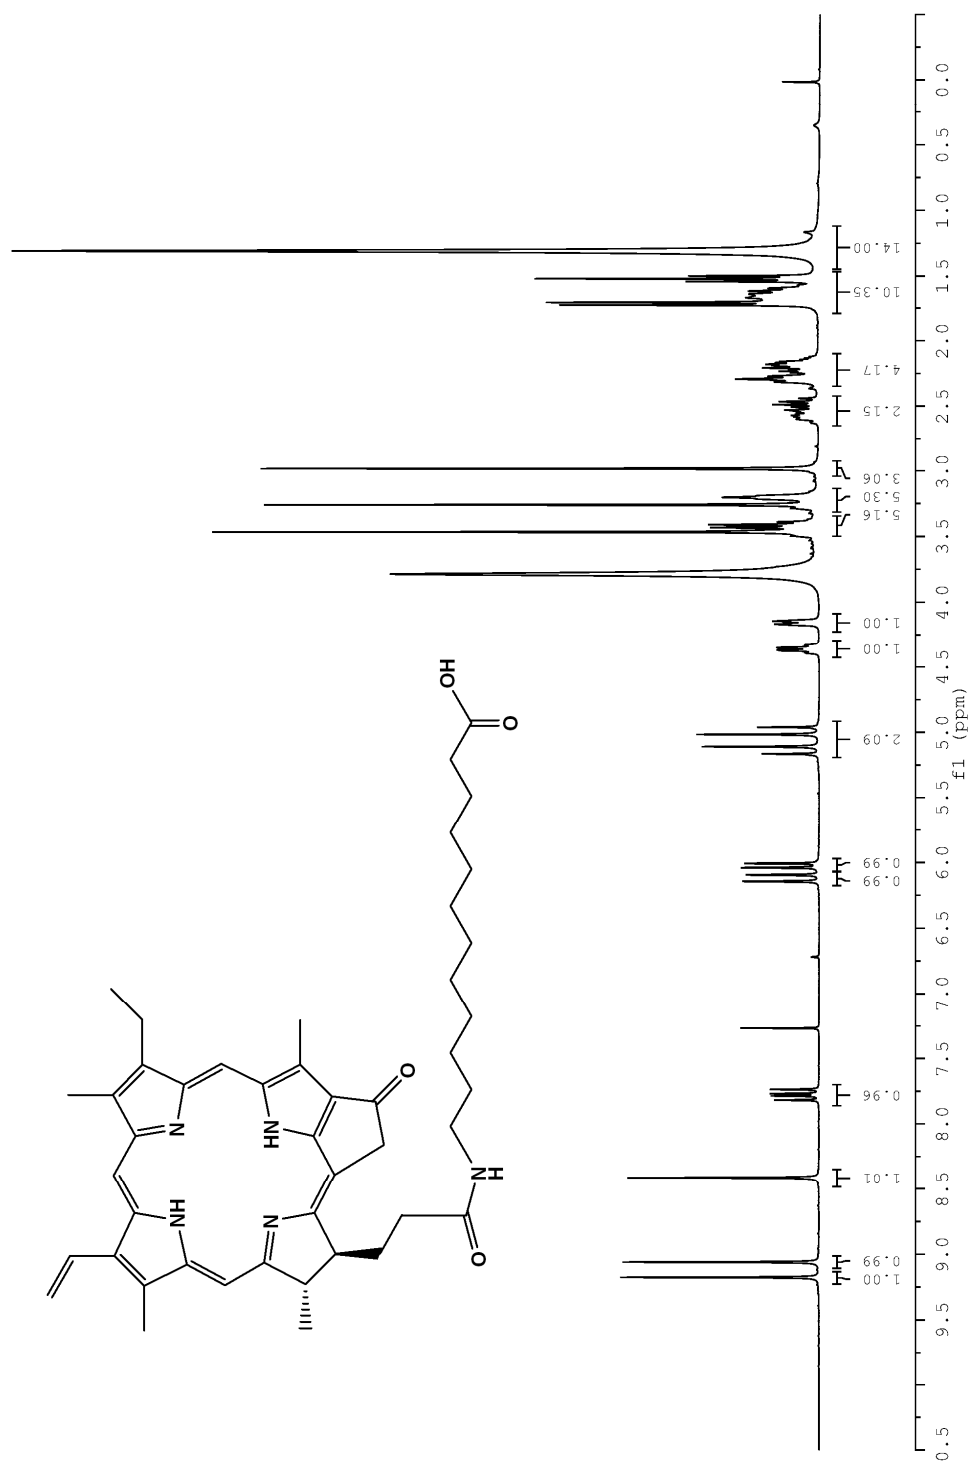

Pyro-PtdEtn (3), <sup>1</sup>H NMR, 360 MHz, CDCl<sub>3</sub>, CD<sub>3</sub>OD

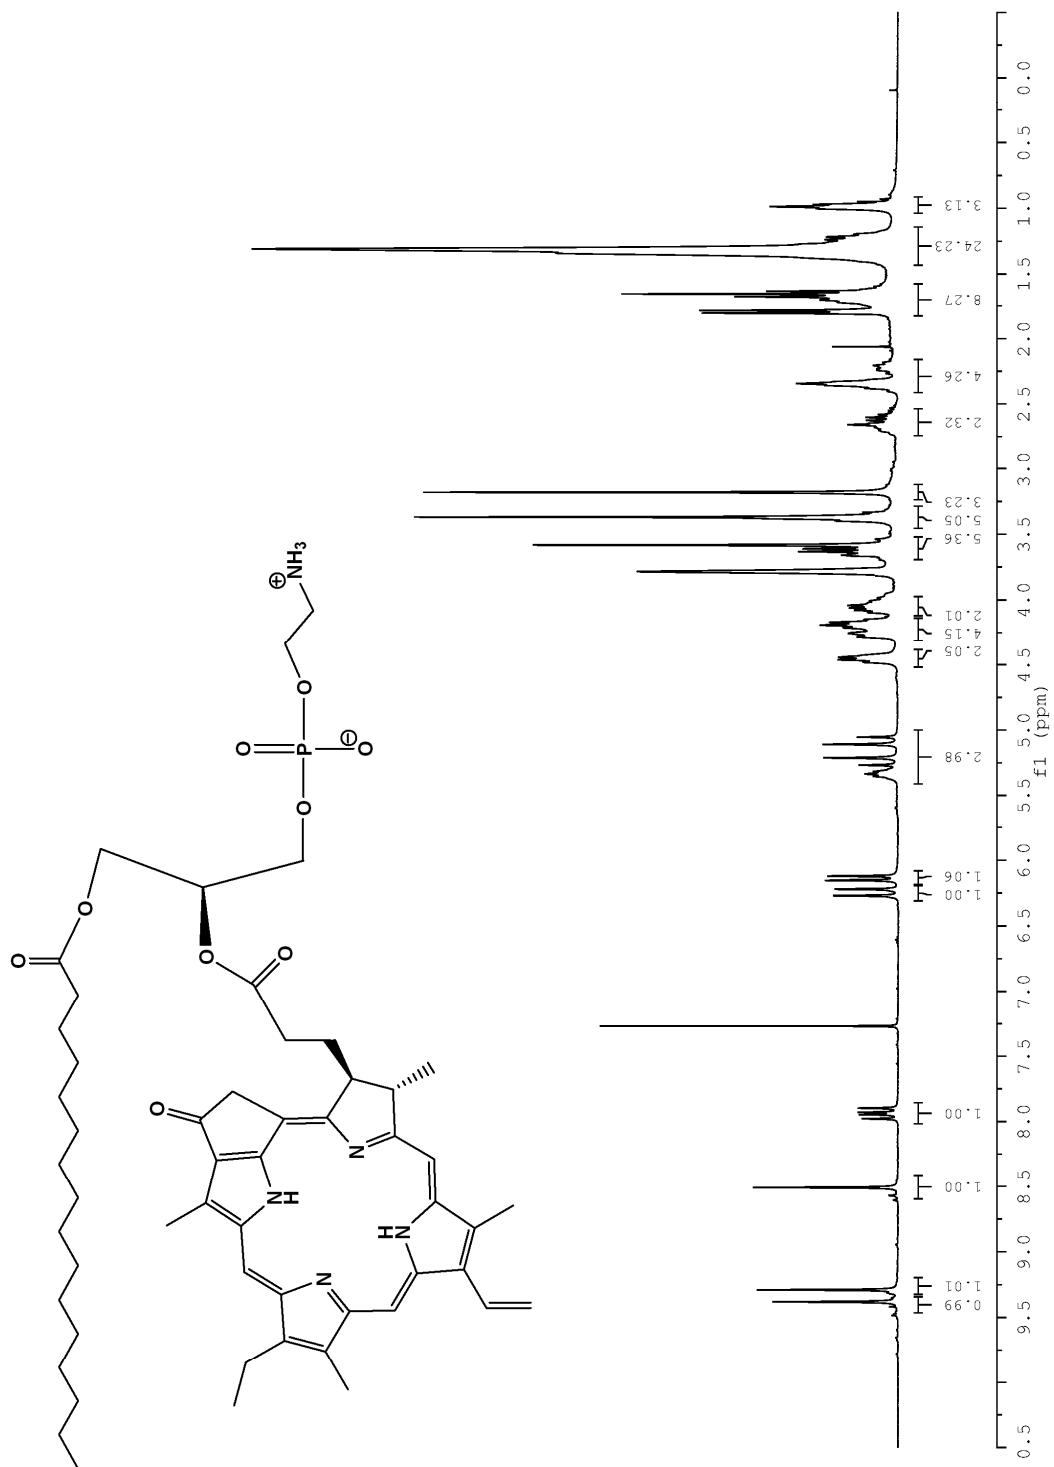





Pyro-PtdEtm-BHQ (4), <sup>1</sup>H NMR, 360 MHz, CDCl<sub>3</sub>, CD3OD

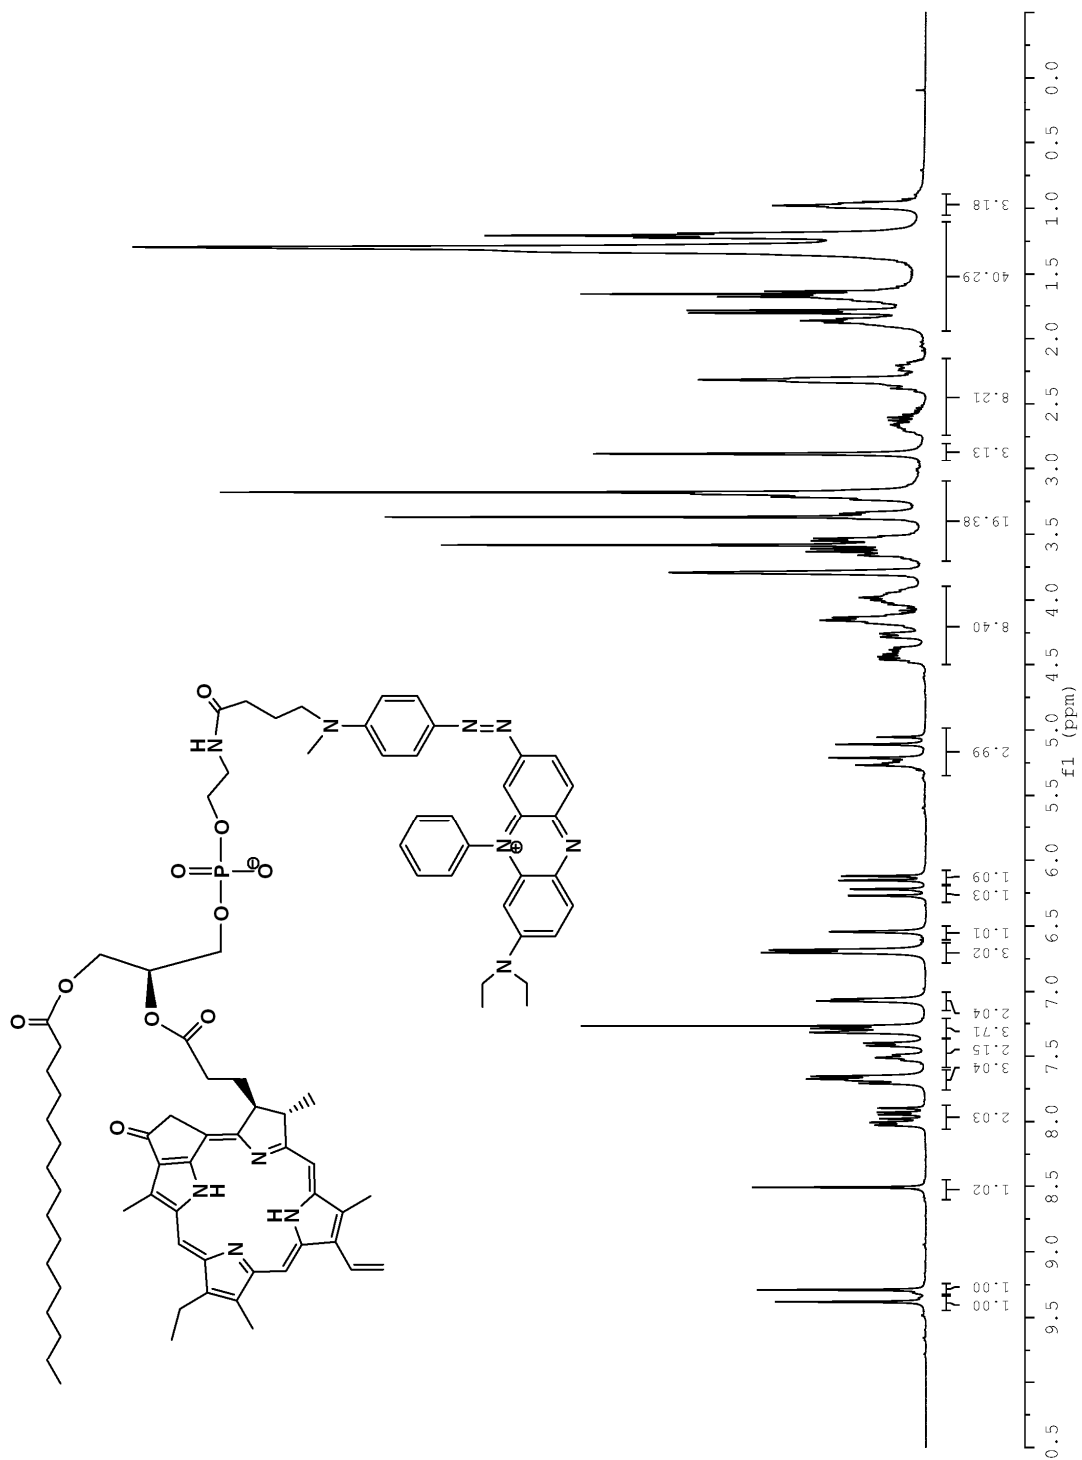

Pyro12-PtdEtn-BHQ (7), <sup>1</sup>H NMR, 360 MHz, CDCl<sub>3</sub>, CD<sub>3</sub>OD, CD<sub>2</sub>Cl<sub>2</sub>

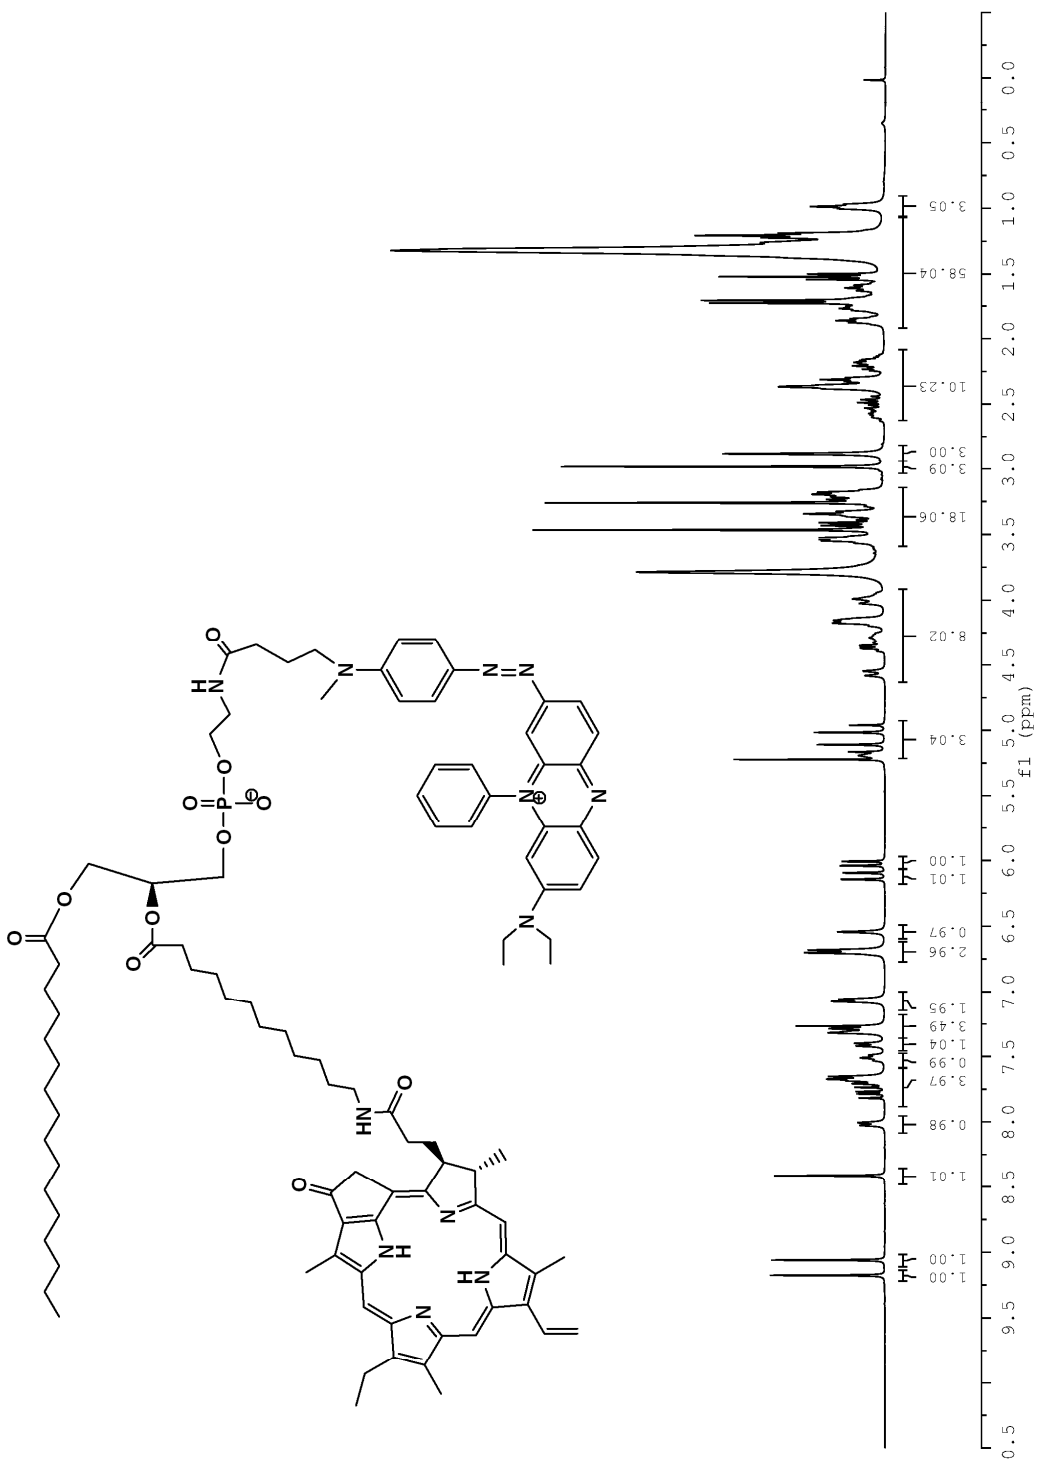

PyroC6-PyroC6-PtdCho (10), <sup>1</sup>H NMR, 360 MHz, CDCl<sub>3</sub>, CD<sub>3</sub>OD, CD<sub>2</sub>Cl<sub>2</sub>

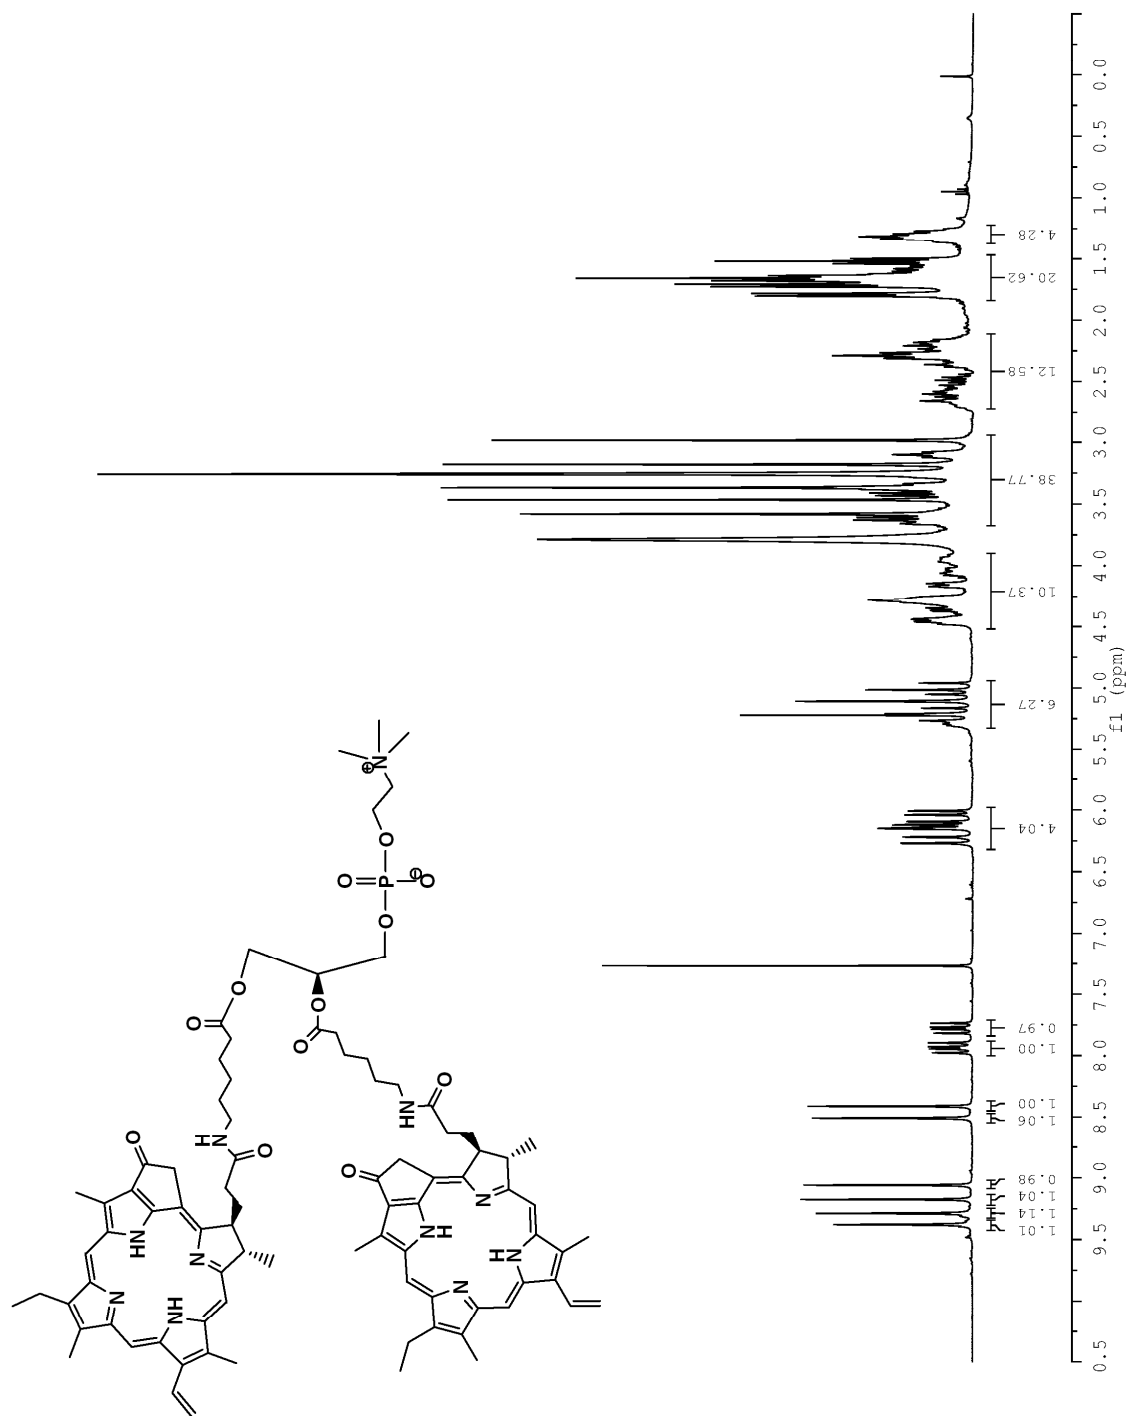

#### IV. Enzyme mediated probe cleavage

The specificity of each probe to a series of phospholipases was determined by measuring fluorescence release in an *in vitro* assay. Probes were prepared in egg-phosphatidylcholine vesicle by adding fluorophores to a measured amount of egg-PtdCho in chloroform. Probe concentration was determined using the Beer-Lambert law by measuring optical density at 418 nm and using an extinction coefficient of  $110,000 \text{ M}^{-1} \text{ cm}^{-1}$ . Chloroform was removed by evaporation, and the resulting film was resuspended in 50 mM Tris-HCl, pH 7.4, sonicated and vortexed until optically clear. The final concentration was 1  $\mu\text{M}$  self-quenched phospholipid probe in 50  $\mu\text{M}$  egg-yolk-PtdCho vesicles (i.e. mole fraction of 0.02). Lipid dispersions were aliquotted into 96-well plates at volumes of 100  $\mu\text{L}$ . Reaction mixtures were incubated for 10 minutes at 37°C and reactions were started by addition of 10U of enzyme. The time-dependent release of fluorescence was measured using a Molecular Devices SpectraMax M5 fluorescent plate reader ( $\lambda_{\text{Ex}}$  418 nm,  $\lambda_{\text{Em}}$  675 nm for the Pyro-derivatives,  $\lambda_{\text{Ex}}$  488 nm,  $\lambda_{\text{Em}}$  530 nm for the BODIPY- derivatives).

#### V. References

- (1) Yang, H., and Roberts, M. F. (2003) Phosphohydrolase and transphosphatidylation reactions of two *Streptomyces* phospholipase D enzymes: Covalent versus noncovalent catalysis. *Protein Sci.* 12, 2087-2098.
- (2) Tomita, M., Sawada, H., Taguchi, R., and Ikezawa, H. (1987) The action of sphingomyelinase from *Bacillus cereus* on ATP-depleted bovine erythrocyte membranes and different lipid composition of liposomes. *Arch. Biochem. Biophys.* 255, 127-135.
- (3) Ryan, M., Liu, T., Dahlquist, F. W., and Griffith, O. H. (2001) A Catalytic Diad Involved in Substrate-Assisted Catalysis: NMR Study of Hydrogen Bonding and Dynamics at the Active Site of Phosphatidylinositol-Specific Phospholipase C. *Biochemistry* 40, 9743-9750.
- (4) Berg, O. G., Yu, B.-Z., Apitz-Castro, R. J., and Jain, M. K. (2004) Phosphatidylinositol-Specific Phospholipase C Forms Different Complexes with Monodisperse and Micellar Phosphatidylcholine. *Biochemistry* 43, 2080-2090.
- (5) Ikezawa, H., Yamanegi, M., Taguchi, R., Miyashita, T., and Ohyabu, T. (1976) Studies on phosphatidylinositol phosphodiesterase (phospholipase C type) of *Bacillus cereus*. I. Purification, properties and phosphatase-releasing activity. *Biochim. Biophys. Acta, Lipids Lipid Metab.* 450, 154-164.
- (6) Antikainen, N. M., Hergenrother, P. J., Harris, M. M., Corbett, W., and Martin, S. F. (2003) Altering Substrate Specificity of Phosphatidylcholine-Preferring Phospholipase C of *Bacillus cereus* by Random Mutagenesis of the Headgroup Binding Site. *Biochemistry* 42, 1603-1610.

- (7) Benfield, A. P., Goodey, N. M., Phillips, L. T., and Martin, S. F. (2007) Structural studies examining the substrate specificity profiles of PC-PLCBc protein variants. *Arch. Biochem. Biophys.* 460, 41-47.
- (8) Hergenrother, P. J., and Martin, S. F. (1997) Determination of the kinetic parameters for phospholipase C (*Bacillus cereus*) on different phospholipid substrates using a chromogenic assay based on the quantitation of inorganic phosphate. *Anal Biochem* 251, 45-49.
- (9) Hergenrother, P. J., and Martin, S. F. (2001) Phosphatidylcholine-preferring phospholipase C from *B. cereus*. function, structure, and mechanism. *Top. Curr. Chem.* 211, 131-167.
- (10) Kinkaid, A., and Wilton, D. C. (1991) Comparison of the catalytic properties of phospholipase A2 from pancreas and venom using a continuous fluorescence displacement assay. *Biochem. J.* 278, 843-848.
- (11) Kudo, I., and Murakami, M. (2002) Phospholipase A2 enzymes. *Prostaglandins Other Lipid Mediators* 68-69, 3-58.
- (12) Murakami, M., and Kudo, I. (2001) Diversity and regulatory functions of mammalian secretory phospholipase A2s. *Adv. Immunol.* 77, 163-194.
- (13) Murakami, M., and Kudo, I. (2002) Lipid signaling. Phospholipase A2. *J. Biochem.* 131, 285-292.
- (14) Zheng, G., Li, H., Zhang, M., Lund-Katz, S., Chance, B., and Glickson, J. D. (2002) Low-density lipoprotein reconstituted by pyropheophorbide cholesteryl oleate as target-specific photosensitizer. *Bioconjug Chem* 13, 392-396.
